# Supplementary material for: Peripheral Upregulation of Parkinson’s Disease-Associated Genes Encoding α-Synuclein, β-Glucocerebrosidase, and Ceramide Glucosyltransferase in Major Depression
Source: MDPI journal article supplement (doi:10.3390/ijms25063219), 2024-03-12
Supplement: s1 [file s1]

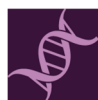

Article

# Peripheral Upregulation of Parkinson's Disease-Associated Genes Encoding $\alpha$ -synuclein, $\beta$ -glucocerebrosidase, and Ceramide Glucosyltransferase in Major Depression

Razvan-Marius Brazdis, Claudia von Zimmermann, Bernd Lenz, Johannes Kornhuber, Christiane Mühle

**Supplementary Table S1:** Group-wise comparisons (p values) for unmedicated, medicated and remitted patients and healthy control subjects at study inclusion (T1) and follow-up (T2, 3 weeks later, only for currently affected patients)

| p values for pair-wise comparisons | PU-PM            | PU-HC            | PM-HC            | PR-HC        | PU-PR            | PM-PR            |
|------------------------------------|------------------|------------------|------------------|--------------|------------------|------------------|
| Age                                | 0.908            | 0.520            | 0.530            | 0.017        | 0.055            | 0.036            |
| Education                          | 0.083            | 0.937            | 0.066            | 0.220        | 0.220            | 0.689            |
| BMI                                | <b>&lt;0.001</b> | 0.616            | 0.001            | 0.362        | 0.192            | 0.080            |
| HAM-D T1                           | 0.087            | <b>&lt;0.001</b> | <b>&lt;0.001</b> | <b>0.017</b> | <b>&lt;0.001</b> | <b>&lt;0.001</b> |
| HAM-D T2                           | 0.237            |                  |                  |              |                  |                  |
| MADRS T1                           | 0.064            | <b>&lt;0.001</b> | <b>&lt;0.001</b> | <b>0.022</b> | <b>&lt;0.001</b> | <b>&lt;0.001</b> |
| MADRS T2                           | 0.171            |                  |                  |              |                  |                  |
| BDI-II T1                          | 0.371            | <b>&lt;0.001</b> | <b>&lt;0.001</b> | 0.376        | <b>&lt;0.001</b> | <b>&lt;0.001</b> |
| BDI-II T2                          | 0.970            |                  |                  |              |                  |                  |
| STAI state T1                      | 0.065            | <b>&lt;0.001</b> | <b>&lt;0.001</b> | <b>0.020</b> | <b>&lt;0.001</b> | <b>&lt;0.001</b> |
| STAI state T2                      | 0.237            |                  |                  |              |                  |                  |
| STAI trait average                 | 0.332            | <b>&lt;0.001</b> | <b>&lt;0.001</b> | <b>0.003</b> | <b>&lt;0.001</b> | <b>&lt;0.001</b> |
| SNCA expression T1                 | 0.309            | 0.160            | <b>0.038</b>     | 0.842        | 0.366            | 0.186            |
| SNCA expression T2                 | 0.157            |                  |                  |              |                  |                  |
| SNCA expression rel. change        | 0.840            |                  |                  |              |                  |                  |
| GBA1 expression T1                 | 0.182            | 0.265            | <b>0.043</b>     | 0.515        | 0.128            | <b>0.017</b>     |
| GBA1 expression T2                 | 0.159            |                  |                  |              |                  |                  |
| GBA1 expression rel. change        | 0.830            |                  |                  |              |                  |                  |
| UGCG expression T1                 | <b>0.028</b>     | 0.055            | <b>&lt;0.001</b> | 0.903        | 0.083            | <b>&lt;0.001</b> |
| UGCG expression T2                 | 0.296            |                  |                  |              |                  |                  |
| UGCG expression rel. change        | 0.321            |                  |                  |              |                  |                  |

p values (nominal  $p < 0.05$  in bold) from Mann-Whitney-U tests comparing patient groups: PU unmedicated depressive patients, PM medicated depressive patients, PR patients with remitted major depressive disorder and HC healthy controls. Parameters—BMI body mass index, BDI-II Beck Depression Inventory-II, HAM-D Hamilton Depression Rating Scale, MADRS Montgomery–Åsberg Depression Rating Scale, STAI State-Trait Anxiety Inventory, peripheral gene expression for SNCA  $\alpha$ -synuclein, GBA1  $\beta$ -glucocerebrosidase, UGCG UDP-glucose ceramide glucosyltransferase normalized to reference genes
